# Supplementary material for: Localization of Kif1c mRNA to cell protrusions dictates binding partner specificity of the encoded protein
Source: PubMed Central journal article supplement (PMC10111864; doi:10.1101/gad.350320.122), 2023-03-01
Supplement: supp_gad.350320.122_Supplemental_legends.pdf [file supp_gad.350320.122_Supplemental_legends.pdf]

## **SUPPLEMENTAL TABLES**

Supplemental Table S1:

- RNA-seq results
- Comparative protrusion enrichment values

Supplemental Table S2:

- Mass spec results

Supplemental Table S3:

- Guide sequences used for Lenticrispr\_v2
- Guide sequences used for generating clonal cell lines
- Genotyping primers for analyzing CRISPR alleles
- Primers for qPCR
- Primers for MiSeq
